# Supplementary material
Source: Springer Nature journal article supplement (https://www.springermedizin.de/resource/supplementary/12889_2010_2560_MOESM3_ESM.pdf/9486444)
Supplement: MOESM3 [file 9486444]

## KIEZEN VOOR ACTIE

**STAP 1**

Beslis wat u wilt veranderen

**STAP 2**

Beslis hoeveel u wilt veranderen

**STAP 3**

Beslis hoe u wilt veranderen

**STAP 4**

Beslis wanneer u wilt veranderen
